# Supplementary material for: Molecular Characterization and Biocompatibility of Exopolysaccharide Produced by Moderately Halophilic Bacterium Virgibacillus dokdonensis from the Saltern of Kumta Coast
Source: MDPI journal article supplement (doi:10.3390/polym14193986), 2022-09-23
Supplement: s1 [file s1]

## **SUPPLEMENTARY MATERIALS**

### **Molecular Characterization and Biocompatibility of Exopolysaccharide Produced by Moderately Halophilic bacterium *Virgibacillus dokdonensis* from the Saltern of Kumta Coast**

#### **Affiliation**

**\*Gurunathan Jayaraman-** Department of Biotechnology, School of Biosciences and Technology, Vellore Institute of Technology, Vellore, Tamil Nadu, India 632014

**# Monic Andrew-** Department of Biotechnology, School of Biosciences and Technology, Vellore Institute of Technology, Vellore, Tamil Nadu, India 632014

**\*Corresponding author:** Dr G.Jayaraman, E-mail: gjayaraman@vit.ac.in. Tel: + 91416 2202011. Fax: + 91 416 224 3092

#### **List of Supplementary Tables**

**Supplementary Table S1.** Total carbohydrate and proteins in EPS;

**Supplementary Table S2.** EPS production of different strains from different locations that are compared to the strains of present study

**Supplementary Table S3.** Anti-coagulant activity of EPS based on APTT and PT

#### **List of Supplementary Figures**

**Supplementary Figure S1. (a)** Mucoid colonies of *Virgibacillus dokdonensis*-VITP14 in Zobell marine agar; **(b)** Morphology of *Virgibacillus dokdonensis*-VITP14 after Gram staining procedure under light microscope 100×.

**Supplementary Figure S2. (a)** EPS production by different carbon sources. **(b)** EPS production under different salt conditions

**Supplementary Figure S3. (a)** Elution curve of EPS fractions in DEAE–cellulose 52 anion-exchange column purified by different concentrations of NaCl (0.1-1.1M); **(b)** Elution curve of EPS on Sephacryl S-300 gel chromatography column with distilled water.

**Supplementary Figure S4.** AFM analysis of EPS (3D view) 800nm scale

**Supplementary Figure S5.** Zeta potential of EPS

**Supplementary Figure S6. (a)** The HPLC results of *Virgibacillus dokdonensis* VITP14 Exopolysaccharide (EPS) (glucose – 5.143 min; ribose – 5.593 min; fructose – 13.236 min; xylose – 13.616 min; **(b)** The HPLC chromatographic peaks of sugar standards: peak 1- arabinose; peak 2 – glucose (5.502 min); peak 3 – galactose

(5.605 min); peak 4 – mannose (5.807 min); peak 5 – ribose (5.884 min); peak 6 – xylose (13.916 min); peak 7 – fructose (13.104 min).

**Supplementary Figure S7.** XRD profile of EPS

**Total:** Tables (3)

**Table S1. Total carbohydrate and proteins in Exopolysaccharides (EPS)**

| Strain                         | Final concentration CHO (% w/w) | Protein (% w/w) |
|--------------------------------|---------------------------------|-----------------|
| <i>Virgibacillus</i> sp VITP14 | 96.75.10 ± 0.76                 | 0.47 ± 0.10     |

**Table S2. EPS production of different strains from different locations that are compared to the strains of present study**

| S.No | Microorganism                                   | Source                                     | Growth Medium                       | EPS Yield (g/L) | Reference                         |
|------|-------------------------------------------------|--------------------------------------------|-------------------------------------|-----------------|-----------------------------------|
| 1    | <i>Pantoea</i> sp. BM39                         | Tyrrhenian Sea                             | EMG medium                          | 21.3            | (Silvi et al 2013)                |
| 2    | <i>Halobacillus</i> sp<br><i>EG1HP4QL</i>       | Lake Qarun, Egypt                          | S-G medium,<br>Sucrose              | 5.9             | (Ibrahim et al 2020)              |
| 3    | <i>Halomonas hydrothermalis</i> MB45            | South Indian Ocean                         | Zobell marine<br>broth              | 5.2             | (Banerjee et al 2020)             |
| 4    | <i>Rhodobacter johrii</i> .                     | Cabo-De-Rama beach<br>Goa, India           | R2A medium<br>with Glucose          | 6.2             | (Sran Kulwinder Singh et al 2019) |
| 5    | <i>E. cloacae</i> VVD-MBB8                      | Gulf of Mannar, Tamil Nadu,<br>India.      | Modified<br>Minimal<br>media        | 18.3            | (Karuppiah et al 2021)            |
| 6    | <b><i>Virgibacillus Dockdonensis VITP14</i></b> | Saltern Kumta coast, Arabian<br>Sea, India | Zobell Marine<br>broth              | 17.3            | <b>Present study</b>              |
|      |                                                 |                                            | Zobell Marine<br>broth +<br>glucose | 23.2            |                                   |
| 7    | <i>Salibacterium halochares</i> STm             | Cuatro Ciénegas Basin,<br>Coahuila Mexico  | yeast extract<br>and NaCl           | 17.3            | (Lopez et al 2021)                |
| 8    | <i>Chromohalobacter salexigens</i>              | Lake Qarun, Egypt                          | Sucrose                             | 15.1            | (Ibrahim et al 2022)              |

**Table S3. Anti-coagulant activity of EPS based on APTT and PT**

| S.No | EPS concentration $\mu\text{g/mL}$ | APTT (seconds)             | PT (seconds)               |
|------|------------------------------------|----------------------------|----------------------------|
| 1    | Control                            | $32.4 \pm 1.8$             | $13.8 \pm 1.9$             |
| 2    | 50                                 | $28.6 \pm 1.4^{\text{ns}}$ | $13.6 \pm 0.8^{\text{ns}}$ |
| 3    | 100                                | $43.2 \pm 1.9^{\text{b}}$  | $24.7 \pm 1.2^{\text{a}}$  |
| 4    | 500                                | $123.3 \pm 1.9^{\text{a}}$ | $61.4 \pm 1.5^{\text{a}}$  |

**Note:** ns-non significant; a- $(p<0.0001)$  b- $(p<0.001)$  were statistically significant in comparison to control

## Figures (7)

### Figure S1:

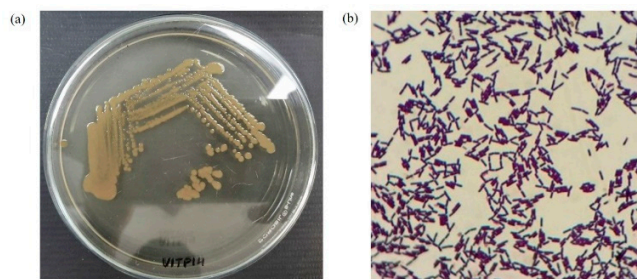

**Figure S1. (a)** Mucoid colonies of *Virgibacillus dokdonensis* VITP14; **(b)** Morphology of *Virgibacillus dokdonensis*-VITP14 (100X Magnification under Light Microscope)

### Figure S2

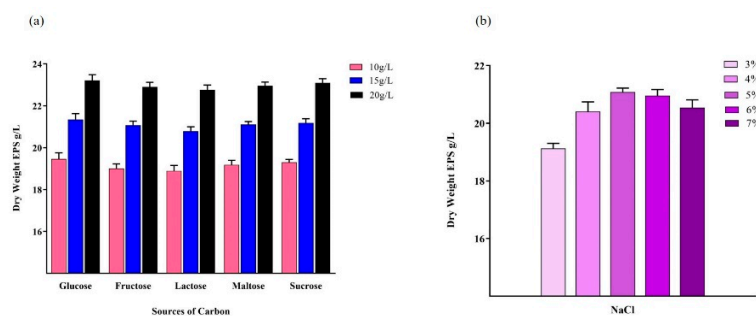

**Figure S2. (a)** EPS production by different carbon sources; **(b)** EPS production under different salt conditions

**Figure S3**

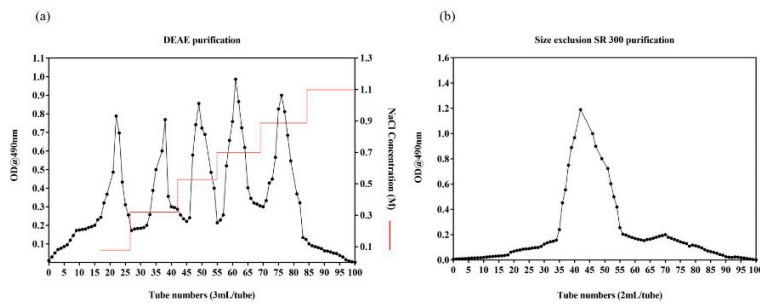

**Figure S3. (a)** Elution curve of EPS fractions in DEAE–cellulose 52 anion-exchange column purified by different concentrations of NaCl (0.1-1.1M); **(b)** Elution curve of EPS on Sephacryl S-300 gel chromatography column with distilled water.

**Figure S4**

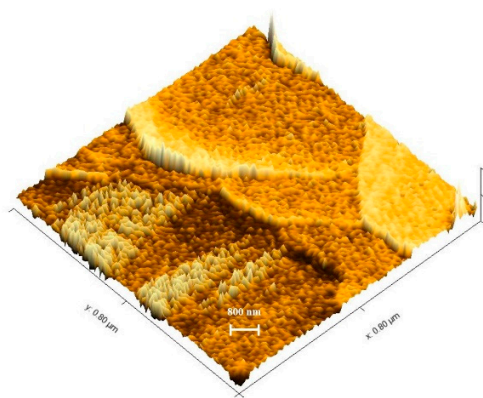

**Figure S4. AFM analysis of EPS (3D view) 800nm scale**

**Figure S5**

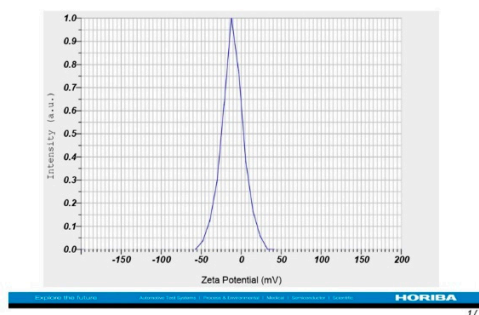

**Figure S5. Zeta potential of EPS**

**Figure S6:**

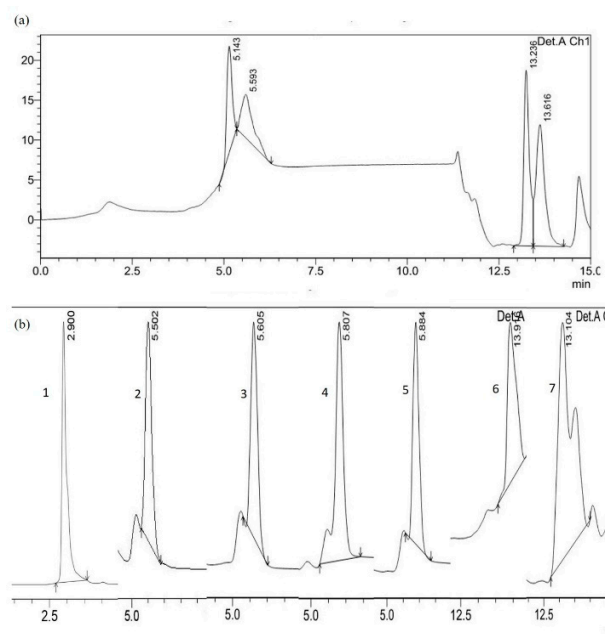

**Figure S6. (a)** The HPLC results of *Virgibacillus dokdonensis* VITP14 Exopolysaccharide (EPS) (glucose – 5.143 min; ribose – 5.593 min; fructose – 13.236 min; xylose – 13.616 min; **(b)** The HPLC chromatographic peaks of sugar standards: peak 1 - arabinose; peak 2 – glucose (5.502 min); peak 3 – galactose (5.605 min); peak 4 – mannose (5.807 min); peak 5 – ribose (5.884 min); peak 6 – xylose (13.916 min); peak 7 – fructose (13.104 min).

**Figure S7:**

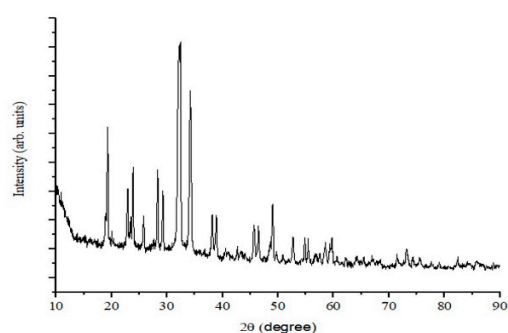

**Figure S7. XRD profile of EPS**
